# Supplementary material
Source: MDPI journal article supplement (https://www.mdpi.com/2077-1312/6/4/152)
Supplement: s1 [file s1]

# Coastal Climate Adaptation Literatures of the Southeast and Northeast U.S.: Regional Comparisons among States and Document Sources

Kenyon C. Lindeman <sup>1,\*</sup>, Christos Giannoulis <sup>2</sup> and Bryce R. Beard <sup>3</sup>

<sup>1</sup> Sustainability Studies Program, Florida Institute of Technology, Melbourne, FL 32937, USA

<sup>2</sup> Institutional Research, Valencia College, Orlando, FL 32811, USA; cgiannoulis@valenciacollege.edu

<sup>3</sup> Penn State Dickinson Law School, Carlisle, PA 17013, USA; bbeard1992@gmail.com

\* Correspondence: lindeman@fit.edu. Tel.: +1-321-271-7547

## Supplemental Materials

**Table S1.** Inclusion and exclusion criteria for literature searches in present study.

| Inclusion                                          | Exclusion                                 |
|----------------------------------------------------|-------------------------------------------|
| <b>Keyword Search</b>                              |                                           |
| English                                            | Non-English                               |
| All Years                                          | Returns after April 15-16, 2015           |
| Indexed in ISI Web of Science                      | Not available in ISI Web of Science       |
| Indexed in Scopus                                  | Not available in Scopus                   |
| Indexed in ProQuest                                | Not available in ProQuest                 |
| Indexed in Academic Search Complete                | Not available in Academic Search Complete |
| Articles, Reports, Reviews, Guidelines, Conference | Abstracts, Flyers, Brochures, Slide files |
| <b>Citation, Title, Abstract Screening</b>         |                                           |
| Human                                              | Natural (e.g. plants, animals)            |
| Coastal climate adaptation                         | Non-coastal climate adaptation            |
| Focus States                                       | Non-included states                       |
| Planning, infrastructure                           | Unrelated Natural Sciences                |
| Climate Change                                     | Unrelated Engineering                     |
| Sea Level Rise                                     | Unrelated Governance                      |
| <b>Full Document Screening</b>                     |                                           |
| Human                                              | Natural (e.g. plants, animals)            |
| Coastal climate adaptation                         | Non-coastal climate adaptation            |
| Focus States                                       | Non-included states                       |
| Planning, infrastructure                           | Unrelated Natural Sciences                |
| Climate Change                                     | Unrelated Engineering                     |
| Sea Level Rise                                     | Unrelated Governance                      |

**Table S2.** Documents included in the analysis (n = 296). Empty cells reflect grey literature (without journal and volume data).

| ID    | Author                         | Year | Title                                                                                                                            | Journal                                                | Vol. (Number) | Pages    |
|-------|--------------------------------|------|----------------------------------------------------------------------------------------------------------------------------------|--------------------------------------------------------|---------------|----------|
| FL 1  | Bjarnadottir, S. et al.        | 2011 | A Probabilistic-based Framework for Impact and Adaptation Assessment of Climate Change on Hurricane Damage Risks and Costs       | Structural Safety                                      | 33 (3)        | 12–26.   |
| FL 2  | Noss, R.                       | 2011 | Between the Devil and the Deep Blue Sea: Florida's Unenviable Position With Respect to Sea Level Rise                            | Climatic Change                                        | 107 (1-2)     | 1–16.    |
| FL 3  | Carlton, S. and Jacobson, S.K. | 2013 | Climate Change and Coastal Environmental Risk Perceptions in Florida                                                             | Journal of Environ. Management                         | 130           | 32–39.   |
| FL 4  | Marshall, A. et al.            | 2011 | Coastal Construction Trends in Response to Coastal Erosion: An Opportunity for Adaptation                                        | Journal of Coastal Conservation                        | 15 (1)        | 61–72.   |
| FL 5  | Jacques, P.                    | 2006 | Downscaling Climate Models and Environmental Policy: From Global to Regional Politics                                            | Journal of Environ. Planning and Management            | 49 (2)        | 301–307. |
| FL 6  | Cooper, H. et al.              | 2015 | Incorporating Uncertainty of Groundwater Modeling in Sea-Level Rise Assessment: A Case Study in South Florida                    | Climatic Change                                        | 129 (1-2)     | 281–294. |
| FL 7  | Frazier, T.G. et al.           | 2013 | Spatial and Temporal Quantification of Resilience at the Community Scale                                                         | Applied Geography                                      | 42            | 95–107.  |
| FL 8  | Gunawansa, A. et al.           | 2014 | A Comparison of Climate Change Mitigation and Adaptation Strategies for the Construction Industries of Three Coastal Territories | Sustainable Development                                | 22 (1)        | 52–62.   |
| FL 9  | Bierbaum, R. et al.            | 2013 | A Comprehensive Review of Climate Adaptation in the United States: More Than Before, But Less Than Needed                        | Mitigation and Adaptation Strategies for Global Change | 18(3)         | 361–406. |
| FL 10 | Stroup, L.J.                   | 2011 | Adaptation of U.S. Water Management to Climate and Environmental Change                                                          | The Professional Geographer                            | 63 (4)        | 414–428. |

|       |                                 |      |                                                                                                                                                                                  |                                    |         |            |
|-------|---------------------------------|------|----------------------------------------------------------------------------------------------------------------------------------------------------------------------------------|------------------------------------|---------|------------|
| FL 11 | Piccininni, F.                  | 2014 | Adaptation to Climate Change and the Everglades Ecosystem                                                                                                                        | Environmental Claims Journal       | 26 (1)  | 63–83.     |
| FL 12 | Hunt, A. and Watkiss, P.        | 2011 | Climate Change Impacts and Adaptation in Cities: a Review of the Literature                                                                                                      | Climatic Change                    | 104 (1) | 13–49.     |
| FL 13 | Heinzman, J. et al.             | 2011 | Climate Prosperity: A Greenprint For Southwest Florida                                                                                                                           | Journal of Business Case Studies   | 7 (4)   | 1–9.       |
| FL 14 | McNamara, D. et al.             | 2011 | Coastal Sustainability Depends on How Economic and Coastline Responses to Climate Change Affect Each Other                                                                       | Geophysical Research Letters       | 38 (7)  | 1–5.       |
| FL 15 | Kettle, N.P. and Dow, K.        | 2014 | Cross-level differences and similarities in coastal climate change adaptation planning                                                                                           | Environmental Science & Policy     | 44      | 279–290.   |
| FL 16 | Havens, K.E. and Steinman, A.D. | 2015 | Ecological Responses of a Large Shallow Lake (Okeechobee, Florida) to Climate Change and Potential Future Hydrologic Regimes                                                     | Environmental Management           | 55 (4)  | 763–775.   |
| FL 17 | Lu, Q.C. et al.                 | 2014 | Economic Analyses of Sea-Level Rise Adaptation Strategies in Transportation Considering Spatial Autocorrelation                                                                  | Transportation Research Part D:    | 33      | 87–94.     |
| FL 18 | Richards, C.L. et al.           | 2010 | Evaluating Adaptive Processes for Conservation and Management of Estuarine and Coastal Resources                                                                                 | Estuaries and Coasts               | 33 (4)  | 805–810.   |
| FL 19 | Estenoz, S. and Bush, S.        | 2015 | Everglades Restoration Science and Decision-Making in the Face of Climate Change: A Management Perspective                                                                       | Environmental Management           | 55 (4)  | 876–883.   |
| FL 20 | Howe, P.                        | 2011 | Hurricane Preparedness as Anticipatory Adaptation: A Case Study of Community Businesses                                                                                          | Environmental Change               | 21 (2)  | 711–720.   |
| FL 21 | Hamilton, A. et al.             | 2010 | Implications of Global Change for the Maintenance of Water Quality and Ecological Integrity in the Context of Current Water Laws and Environmental Policies                      | Global Change and River Ecosystems |         | 263–316.   |
| FL 22 | Paton, F.L. et al.              | 2014 | Including Adaptation and Mitigation Responses to Climate Change in a Multi-objective Evolutionary Algorithm Framework for Urban Water Supply Systems Incorporating GHG Emissions | Water Resources Research           | 50 (8)  | 6285–6304. |
| FL 23 | Bardsley, T. et al.             | 2013 | Planning for an Uncertain Future: Climate Change Sensitivity Assessment toward Adaptation Planning for Public Water Supply                                                       | Earth Interactions                 | 17 (23) | 1–26.      |

|          |                                            |      |                                                                                                                                                      |                                           |          |              |
|----------|--------------------------------------------|------|------------------------------------------------------------------------------------------------------------------------------------------------------|-------------------------------------------|----------|--------------|
| FL<br>24 | Sherwood, E.T.<br>and Greening,<br>H.S.    | 2014 | Potential Impacts and Management Implications of Climate Change on Tampa Bay Estuary Critical Coastal Habitats                                       | Environmental<br>Management               | 53 (2)   | 401-<br>415. |
| FL<br>25 | Williams, S.J.                             | 2013 | Sea-Level Rise Implications for Coastal Regions                                                                                                      | Journal of<br>Coastal<br>Research         | 63       | 184-<br>196. |
| FL<br>26 | Curtis, K.J. and<br>Schneider, A.          | 2011 | Understanding the Demographic Implications of Climate Change: Estimates of Localized Population Predictions Under Future Scenarios of Sea-Level Rise | Population<br>and<br>Environment          | 33 (1)   | 28-<br>54.   |
| FL<br>27 | Lowman, M.                                 | 2009 | A Blueprint for Florida's Clean Energy Future - Case Study of a Regional Government's Environmental Strategy                                         | Sustainability                            | 1 (2)    | 97-<br>103.  |
| FL<br>28 | Genovese, E. and<br>Green, C.              | 2014 | Assessment of Storm Surge Damage to Coastal Settlements in Southeast Florida                                                                         | Journal of<br>Risk<br>Research            | 18 (4)   | 407-<br>427. |
| FL<br>29 | Bloetscher, F. et<br>al.                   | 2010 | Improving Resilience Against the Effects of Climate Change                                                                                           | American<br>Water<br>Works<br>Association | 102 (11) | 36-<br>46.   |
| FL<br>30 | Nungesser, M. et<br>al.                    | 2015 | Potential Effects of Climate Change on Florida's Everglades                                                                                          | Environmental<br>Management               | 55 (4)   | 824-<br>835. |
| FL<br>31 | Convertino, M.<br>et al.                   | 2013 | Enhanced Adaptive Management: Integrating Decision Analysis, Scenario Analysis and Environmental Modeling for the Everglades                         | Scientific<br>Reports                     | 3        | 1-9.         |
| FL<br>32 | Bloetscher, F. et<br>al.                   | 2014 | Identifying FDOT's Physical Transportation Infrastructure Vulnerable to Sea Level Rise                                                               | Journal of<br>Infrastructure<br>Systems   | 20 (2)   | 1-9.         |
| FL<br>33 | FEMA                                       | 2014 | Region IV Coastal Flood Risk Study - East Coast Central Florida Study Area                                                                           |                                           |          | 1-2.         |
| FL<br>34 | Vargas-Moreno,<br>J. C. and<br>Flaxman, M. | 2010 | Addressing the Challenge of Climate Change in the Greater Everglades Landscape                                                                       |                                           |          | 1-<br>18.    |
| FL<br>35 | SFRCCC                                     | 2012 | Analysis of the Vulnerability of Southeast Florida to Sea Level Rise                                                                                 |                                           |          | 1-<br>181.   |
| FL<br>36 | Parkinson, R.W.<br>and McCue, T.           | 2011 | Assessing Municipal Vulnerability to Predicted Sea Level Rise: City of Satellite Beach, Florida                                                      | Climatic<br>Change                        | 107 (1)  | 203-<br>223. |
| FL<br>37 | FL Reef<br>Resilience                      | 2010 | Climate Change Action Plan for the Florida Reef System                                                                                               |                                           |          | 1-<br>20.    |

|          |                           |      |                                                                                                                                      |                                      |               |              |
|----------|---------------------------|------|--------------------------------------------------------------------------------------------------------------------------------------|--------------------------------------|---------------|--------------|
| FL<br>38 | SFWMD                     | 2009 | Climate Change and Water Management in South Florida                                                                                 |                                      |               | 1–<br>23.    |
| FL<br>39 | Miami-Dade<br>Gov.        | 2010 | Climate Change Assessment Area                                                                                                       |                                      |               | 1–<br>21.    |
| FL<br>40 | Bloetscher, F. et<br>al.  | 2009 | Improving the Resilience of a Municipal Water Utility Against the Likely Impacts of Climate Change                                   |                                      |               | 1–<br>58.    |
| FL<br>41 | ECFRPC                    | 2004 | Land Use Impacts and Solutions to Sea Level Rise in East Central Florida                                                             |                                      |               | 1–<br>115.   |
| FL<br>42 | Broward County<br>Muni.   | 2013 | Mayor's Climate Action Pledge                                                                                                        |                                      |               | 1–4.         |
| FL<br>43 | City of Miami             | 2014 | Memo                                                                                                                                 |                                      |               | 1–7.         |
| FL<br>44 | SFRCCC                    | 2012 | Regional Climate Action Framework: Implementation Guide                                                                              |                                      |               | 1–<br>42.    |
| FL<br>45 | TCRPC                     | 2005 | Sea Level Rise in the Treasure Coast Region                                                                                          |                                      |               | 1–<br>47.    |
| FL<br>46 | CCATF                     | 2008 | Second Report and Initial Recommendations Presented to The Miami-Dade Board of County Commissioners                                  |                                      |               | 1–<br>101.   |
| FL<br>47 | SFRCCC                    | 2011 | Southeast Florida Regional Climate Change Compact Section 1.4 Policy and Advocacy Implementation Report                              |                                      |               | 1–4.         |
| FL<br>48 | CUES FAU                  | 2009 | Southeast Florida's Resilient Water Resources                                                                                        |                                      |               | 1–<br>122.   |
| FL<br>49 | FAU                       | 2009 | Southeast Florida's Resilient Water Resources                                                                                        |                                      |               | 1–<br>16.    |
| FL<br>50 | Park J. et al.            | 2011 | Storm Surge Projections and Implications for Water Management in South Florida                                                       | Climatic<br>Change                   | 107 (1-<br>2) | 109–<br>128. |
| FL<br>51 | Horowitz, A.D.            | 2013 | The Effects of Sea Level Rise 4 On Historic Districts and the 5 Need for Adaptation                                                  |                                      |               | 1–<br>305.   |
| FL<br>52 | Shivalani, M.P.<br>et al. | 2003 | Visitor Preferences for Public Beach Amenities and Beach Restoration in South Florida                                                | Coastal<br>Managem<br>ent            | 31 (4)        | 367–<br>385. |
| FL<br>53 | Mozumder, P. et<br>al.    | 2011 | Adaptation Behavior in the Face of Global Climate Change: Survey Responses from Experts and Decision Makers Serving the Florida Keys | Ocean &<br>Coastal<br>Managem<br>ent | 54 (1)        | 37–<br>44.   |
| FL<br>54 | Zhang, K. et al.          | 2011 | Assessment of Sea Level Rise Impacts on Human Population and Real Property in the Florida Keys                                       | Climatic<br>Change                   | 107 (1-<br>2) | 129–<br>146. |
| FL<br>55 | City of Key West          | 2009 | Climate Action Plan                                                                                                                  |                                      |               | 1–<br>64.    |

|          |                               |      |                                                                                                                           |                                         |           |             |
|----------|-------------------------------|------|---------------------------------------------------------------------------------------------------------------------------|-----------------------------------------|-----------|-------------|
| FL<br>56 | Flugman, E. et al.            | 2011 | Facilitating Adaptation to Global Climate Change: Perspectives from Experts and Decision Makers Serving the Florida Keys  | Climatic Change                         | 112 (3-4) | 1015 – 1035 |
| FL<br>57 | TNC                           | 2009 | Initial Estimates of the Ecological and Economic Consequences of Sea Level Rise on the Florida Keys through the Year 2100 |                                         |           | 1–36.       |
| FL<br>58 | Monroe County CCAC            | 2013 | Monroe County Climate Action Plan                                                                                         |                                         |           | 1–62.       |
| FL<br>59 | Dean, R.G.                    | 1985 | The Ultimate High Tide                                                                                                    | Civil Engineering Magazine              | 56 (9)    | 64–66.      |
| FL<br>60 | Kettle, N.P. and Dow, K.      | 2014 | The Role of Perceived Risk, Uncertainty and Trust on Coastal CC Adaptation                                                | Environment and Behavior                | 48 (4)    | 579–606.    |
| FL<br>61 | Linhoss, A.C. et al.          | 2013 | A Multi-Disciplinary Review of Current Sea-Level Rise Research in Florida                                                 |                                         |           | 1–18.       |
| FL<br>62 | SFRCCC                        | 2012 | A Region Responds to a Changing Climate Southeast Florida Regional Climate Change Compact Counties                        |                                         |           | 1–84.       |
| FL<br>63 | SFRPC                         | 2013 | Adaptation Action Areas: Policy Options for Adaptive Planning For Rising Sea Levels                                       |                                         |           | 1–35.       |
| FL<br>64 | Noss, R.F. et al.             | 2014 | Adaptation to Sea-level rise in Florida: Biological Conservation Priorities                                               | Final Report. To the Kresge Foundation. |           | 1–104.      |
| FL<br>65 | Parkinson, R.W. and McCue, T. | 2009 | Adapting to Rising Sea Level: A Florida Perspective                                                                       |                                         |           | 1–7.        |
| FL<br>66 | Deyle, R.E. et al             | 2007 | Adaptive Response Planning to Sea Level Rise in Florida and Implications for Comprehensive and Public-Facilities Planning |                                         |           | 1–83.       |
| FL<br>67 | Ruppert, T.K.                 | 2011 | Analysis and 2011 Update on the Bert J. Harris, Jr., Private Property Rights Protection Act                               |                                         |           | 1–24.       |
| FL<br>68 | CUES FAU                      | 2008 | Assessment of Redefining Florida’s Coastal High Hazard Area                                                               |                                         |           | 1–78.       |
| FL<br>69 | Ariza, E. et al.              | 2014 | Beach Management in Florida: Assessing Stakeholder Perceptions on Governance                                              | Ocean & Coastal Management              | 96        | 82–93.      |
| FL<br>70 | Noss, R.F.                    | 2011 | Between the Devil and the Deep Blue Sea: Florida’s Unenviable Position With Respect to Sea Level Rise                     | Climatic Change                         | 107 (1-2) | 1–16.       |

|          |                                 |      |                                                                                                                                |                                  |    |              |
|----------|---------------------------------|------|--------------------------------------------------------------------------------------------------------------------------------|----------------------------------|----|--------------|
| FL<br>71 | FOCC                            | 2010 | Climate Change and Sea-Level Rise in Florida an Update of the Effects of Climate Change on Florida's Ocean & Coastal Resources |                                  |    | 1–<br>36.    |
| FL<br>72 | Harrington, J. and Walton, T.L. | 2007 | Climate Change in Coastal Areas in Florida: Sea Level Rise Estimation and Economic Analysis to Year 2080                       |                                  |    | 1–<br>87.    |
| FL<br>73 | CSPP                            | 2007 | Climate Change in Florida Is There a Human Footprint in Florida's Climate History?                                             |                                  |    | 1–<br>20.    |
| FL<br>74 | Misra, V. et al.                | 2011 | Climate Scenarios: A Florida-Centric View A White Paper on Climate Scenarios for Florida                                       |                                  |    | 1–<br>71.    |
| FL<br>75 | DCA                             | 2006 | Coastal High Hazard Study Committee                                                                                            |                                  |    | 1–<br>17.    |
| FL<br>76 | Lindeman, K.C. et al.           | 2010 | Participatory Climate Adaptation in Coastal Florida: Increasing Roles for Water-Users and Independent Science                  |                                  |    | 1–5.         |
| FL<br>77 | Lindeman, K.C.                  | 1997 | Comparative Management of Beach Systems of Florida and the Antilles                                                            |                                  |    | 1–<br>29.    |
| FL<br>78 | Borisova, T. et al.             | 2008 | Comprehensive Southwest Florida/Charlotte Harbor Climate Change Vulnerability Assessment                                       |                                  |    | 1–<br>12.    |
| FL<br>79 | Bloetscher, F. et al.           | 2011 | Development of an Adaptation Toolbox to Protect Southeast Florida Water Supplies from Climate Change                           | Environmental Reviews            | 19 | 397–<br>417. |
| FL<br>80 | Berry, L. et al.                | 2012 | Development of a Methodology for the Assessment of SLR Impacts on Florida's Transportation Modes and Infrastructure            |                                  |    | 1–<br>148.   |
| FL<br>81 | TNC                             | 2009 | Economic Benefits of Land Conservation A Case for Florida Forever                                                              |                                  |    | 1–<br>28.    |
| FL<br>82 | Borisova, T. et al.             | 2008 | Economic Impacts of Climate Change on Florida: Estimates from Two Studies <sup>1</sup>                                         |                                  |    | 1–<br>12.    |
| FL<br>83 | Ruppert, T.K.                   | 2008 | Eroding Long-Term Prospects for Florida's Beaches: Florida's Coastal Construction Control Line Program                         | Sea Grant Law and Policy Journal | 1  | 1–<br>65.    |
| FL<br>84 | Crist                           | 2007 | Establishing Climate Change Leadership by Example: E.O. 07-126                                                                 |                                  |    | 1–8.         |
| FL<br>85 | The white house                 | 2014 | FACT SHEET: What Climate Change Means for Florida and the Southeast and Caribbean                                              |                                  |    | 1–4.         |
| FL<br>86 | FEMA et al.                     | 2011 | Flood Insurance Rate Maps vs. Storm Surge Inundation Maps                                                                      |                                  |    | 1.           |
| FL<br>87 | FCA et al.                      | 2002 | Florida - Saving Energy, the Environment, and Money                                                                            |                                  |    | 1–<br>28.    |
| FL<br>88 | UF                              | 2006 | Florida 2060 A Population Distribution Scenario for the State of Florida                                                       |                                  |    | 1–<br>29.    |

|        |                                |      |                                                                                                                                                         |                          |    |        |
|--------|--------------------------------|------|---------------------------------------------------------------------------------------------------------------------------------------------------------|--------------------------|----|--------|
| FL 89  | FAU                            | 2008 | Florida's Resilient Coasts: A State Policy Framework for Adaptation to Climate Change                                                                   |                          |    | 1-74.  |
| FL 90  | Stanton, E.A. and Ackerman, F. | 2007 | Florida and Climate Change the Cost of Inaction                                                                                                         |                          |    | 1-104. |
| FL 91  | Galindo-Gonzalez, S. et al.    | 2011 | Florida Climate Change Education and Training: State University System Cooperative Plan                                                                 |                          |    | 1-85.  |
| FL 92  | CCS                            | 2009 | Florida Energy and Climate Action Plan Summary                                                                                                          |                          |    | 1-8.   |
| FL 93  | Koch-Rose, M. et al.           | 2011 | Florida Water Management and Adaptation in the Face of Climate Change                                                                                   |                          |    | 1-68.  |
| FL 94  | Wozniak, K. et al.             | 2012 | Florida's Coastal Hazards Disclosure Law: Property Owner Perceptions of the Physical and Regulatory Environment                                         |                          |    | 1-71.  |
| FL 95  | FL Taxwatch                    | 2010 | Florida's Financial Exposure from Its "Self-Insurance" Programs: The Citizens Property Insurance Corporation and the Florida Hurricane Catastrophe Fund |                          |    | 1-18.  |
| FL 96  | CCS                            | 2008 | Florida's Energy & Climate Change Action Plan                                                                                                           |                          |    | 1-609. |
| FL 97  | FDEO                           | 2013 | How Countries, States, and Florida Address Sea Level Rise                                                                                               |                          |    | 1-103. |
| FL 98  | Leatherman, S.P.               | 1988 | Impact of climate-induced sea level rise on coastal areas                                                                                               |                          |    | 1-5.   |
| FL 99  | DEO                            | 2011 | Implementing "Adaptation Action Area" Policies in Florida                                                                                               |                          |    | 1-35.  |
| FL 100 | Estevez, E.D.                  | 1987 | Implications of Sea Level Rise for Wetlands Creation and Management in Florida                                                                          |                          |    | 1-11.  |
| FL 101 | Estevez, E.D.                  | 1990 | Long Term Implications of Sea Level Change for the Mississippi and Alabama Coastlines                                                                   |                          |    | 1-112. |
| FL 102 | Bush, D.M. et al.              | 2004 | Living with Florida's Atlantic Beaches                                                                                                                  |                          |    | 1-25.  |
| FL 103 | FOA                            | 2009 | Moving Ahead: The Next Step in Ocean Management for Florida                                                                                             |                          |    | 1-81.  |
| FL 104 | Christie, D.R.                 | 2009 | Of Beaches, Boundaries, and SOBS                                                                                                                        | J. Land Use & Env'tl. L. | 25 | 1-19.  |
| FL 105 | Lausche, B.J.                  | 2009 | Policy Tools for Local Adaptation to Sea Level Rise                                                                                                     |                          |    | 1-28.  |
| FL 106 | CCSF & IAF                     | 2006 | Preliminary Draft Climate Change, Sustainability & Technology                                                                                           |                          |    | 1-13.  |
| FL 107 | FCOC                           | 2008 | Preparing For A Sea Change In Florida                                                                                                                   |                          |    | 1-8.   |



|        |                                |      |                                                                                                                                                   |                                                   |           |          |
|--------|--------------------------------|------|---------------------------------------------------------------------------------------------------------------------------------------------------|---------------------------------------------------|-----------|----------|
| FL 108 | Fishman, A.                    | 2012 | Preserving Legal Avenues For Climate Justice In Florida Post-American Electric Power                                                              | Fla. L. Rev.                                      | 64        | 295–304. |
| FL 109 | DCA                            | 2006 | Protecting Florida's Communities                                                                                                                  |                                                   |           | 1–17.    |
| FL 110 | Choate III, J.F. and James, F. | 2011 | Sea Level Rise Planning for Florida's Nuclear Energy Infrastructure: A Wait and "Sea" Approach?                                                   | Sea Grant Law and Policy Journal                  | 4         | 1–28.    |
| FL 111 | Martin, J. et al.              | 2011 | Structured Decision Making as a Proactive Approach to Dealing With Sea Level Rise in Florida                                                      | Climatic Change                                   | 107 (1-2) | 185–202. |
| FL 112 | FOCC                           | 2009 | The Effects Of Climate Change On Florida's Ocean & Coastal Resources                                                                              |                                                   |           | 1–40.    |
| FL 113 | Rose, A. and Wei, D.           | 2009 | The Economic Impact of the Florida Energy and Climate Change Action Plan on the State's Economy                                                   |                                                   |           | 1–32.    |
| FL 114 | CUES FAU                       | 2009 | The Florida Planning Toolbox                                                                                                                      |                                                   |           | 1–202.   |
| FL 115 | Frazier, T.G. et al.           | 2009 | A Framework for Using GIS and Stakeholder Input to Assess Vulnerability to Coastal-Inundation Hazards: A Case Study from Sarasota County, Florida | Building safer communities. Amsterdam : IOS Press |           | 226–245. |
| FL 116 | SWRPC & CHNEP                  | 2009 | City of Punta Gorda Adaptation Plan                                                                                                               |                                                   |           | 1–409.   |
| FL 117 | SFRPC                          | 2009 | Draft Southwest Florida / Charlotte Harbor Climate Change Vulnerability Assessment                                                                |                                                   |           | 1–78.    |
| FL 118 | Condon, A.J. and Sheng, Y.P.   | 2011 | Evaluation of Coastal Inundation Hazard for Present and Future Climates                                                                           | Natural Hazards                                   | 62 (2)    | 345–373. |
| FL 119 | TBRPC                          | 1993 | Implications and Management of SLR in Sarasota Bay Region                                                                                         |                                                   |           | 1–112.   |
| FL 120 | Frazier, T.G. et al.           | 2010 | Influence of Potential Sea Level Rise on Societal Vulnerability to Hurricane Storm-Surge Hazards, Sarasota County, Florida                        | Applied Geography                                 | 30 (4)    | 490–505. |
| FL 121 | Beever, J.W. et al.            | 2010 | Lee County Climate Change Resiliency Strategy (CCRS)                                                                                              |                                                   |           | 1–163.   |
| FL 122 | Pace, N.L.                     | 2013 | Resilient Coastal Development through Land Use Planning: Tools & Management Techniques in the Gulf of Mexico                                      |                                                   |           | 1–18.    |
| FL 123 | Christie, D.R.                 | 2011 | Sea Level Rise and Gulf Beaches: The Spector of Judicial Takings                                                                                  | Journal of Land Use & Environmental Law           | 26 (2)    | 313–325. |

|           |                                |      |                                                                                                                                       |                               |        |            |
|-----------|--------------------------------|------|---------------------------------------------------------------------------------------------------------------------------------------|-------------------------------|--------|------------|
| FL<br>124 | Frazier, T.G. et al.           | 2010 | Stakeholder Perspectives on Land-Use Strategies for Adapting to Climate-Change-Enhanced Coastal Hazards: Sarasota, Florida            | Applied Geography             | 30 (4) | 506–517.   |
| FL<br>125 | Pace, N.L.                     | 2010 | Wetlands or Seawalls? Adapting Shoreline Regulation to Address Sea Level Rise and Wetland Preservation in the Gulf of Mexico          | J. Land Use & Envtl. L.       | 26     | 328–362.   |
| FL<br>126 | FL Cent Comm                   | 2007 | Century Commission for a Sustainable Florida First Annual Report to the Governor and the Legislature                                  |                               |        | 1–95.      |
| SC<br>1   | Dow, K. et al.                 | 2007 | Why Worry? Community Water System Managers' Perceptions of Climate Vulnerability                                                      | Global Environmental Change   | 17 (2) | 228–237.   |
| SC<br>2   | Bures, R. and Kanapaux, W.     | 2011 | Historical Regimes and Social Indicators of Resilience in an Urban System: the Case of Charleston, South Carolina                     | Ecology & Society             | 16 (4) | 1–11.      |
| SC<br>3   | Dow, K. et al.                 | 2013 | The Role of Ad Hoc Networks in Supporting Climate Change Adaptation: a Case Study from the Southeastern United States                 | Regional Environmental Change | 13 (6) | 1235–1244. |
| SC<br>4   | Kettle, N.P, et al.            | 2014 | Integrating Scientific and Local Knowledge to Inform Risk-Based Management Approaches for Climate Adaptation                          | Climate Risk Management       | 4      | 17–31.     |
| SC<br>5   | London, J.B. and Volonte, C.R. | 1991 | Land Use Implications of SLR: a Case study at Myrtle Beach, SC                                                                        | Coastal Management            | 19     | 205–218.   |
| SC<br>6   | SC DNR                         | 2011 | Climate Change Impacts to Natural Resources in South Carolina                                                                         |                               |        | 1–101.     |
| SC<br>7   | Kana, T.W. et al.              | 1988 | Charleston Case Study                                                                                                                 |                               |        | 1–22.      |
| SC<br>8   | SC Sea Grant                   | 2008 | Citizens Guide to Community Planning                                                                                                  |                               |        | 1–14.      |
| SC<br>9   | Vandiver, L. and Hernandez, D. | 2010 | Assessment of Stormwater Management in Coastal South Carolina: A Focus on Stormwater Ponds and Low Impact Development (LID) Practices |                               |        | 1–6.       |
| SC<br>10  | Barth, M.C. et al.             | 1984 | The Economic Impacts of Sea Level Rise on the Charleston, SC Area                                                                     |                               |        | 1–33.      |
| SC<br>11  | Bath, S. et al.                | 2014 | Beaufort County, SC Public Workshops On Sea Level Rise Adaptation Strategies                                                          |                               |        | 1–14.      |
| NC<br>1   | Paerl, H.W. et al.             | 2006 | Assessing the Effects of Nutrient Management in an Estuary Experiencing Climatic Change: The Neuse River Estuary, North Carolina      | Environmental management      | 37 (3) | 422–436.   |

|          |                            |      |                                                                                                              |                                                                       |          |              |
|----------|----------------------------|------|--------------------------------------------------------------------------------------------------------------|-----------------------------------------------------------------------|----------|--------------|
| NC<br>2  | McNamara, D.E.<br>et al.   | 2013 | A Coupled Physical and Economic Model of the Response of Coastal Real Estate to Climate Risk                 | Nature<br>Climate<br>Change                                           | 3 (6)    | 559.         |
| NC<br>3  | Devlin, et al.             | 2014 | Climate Change and Public Health in North Carolina: A Unique State Offers a Unique Perspective               | Environmental Health<br>Perspectives                                  | 122 (6)  | 1-2.         |
| NC<br>4  | Filatova T. and<br>Bin, O. | 2014 | Changing Climate, Changing Behavior: Adaptive Economic Behavior and Housing Markets Responses to Flood Risks | Advances in<br>Social<br>Simulation                                   |          | 249-<br>258. |
| NC<br>5  | McNamara, D.E.<br>et al.   | 2015 | Climate Adaptation and Policy-Induced Inflation of Coastal Property Value                                    | PLoS one                                                              | 10 (3)   | 1-<br>12.    |
| NC<br>6  | Poulter, B. et al.         | 2009 | Sea-Level Rise Research and Dialogue in North Carolina: Creating Windows for Policy Change                   | Ocean &<br>Coastal<br>Management:                                     | 52 (3-4) | 147-<br>153. |
| NC<br>7  | Clark, W. et al.           | 2010 | North Carolina                                                                                               |                                                                       |          | 1-<br>146.   |
| NC<br>8  | Overton, M. et<br>al.      | 2010 | North Carolina Sea-Level Rise Assessment Report                                                              |                                                                       |          | 1-<br>16.    |
| NC<br>9  | NCILT                      | 2012 | Climate Ready North Carolina Building a Resilient Future                                                     |                                                                       |          | 1-<br>152.   |
| NC<br>10 | CH2MHILL                   | 2013 | Community Resilience Pilot Project Wilmington, North Carolina                                                |                                                                       |          | 1-<br>50.    |
| NC<br>11 | DOW                        | 2010 | Understanding the Impacts of Climate Change on Fish and Wildlife in North Carolina                           |                                                                       |          | 1-<br>218.   |
| NC<br>12 | Riggs, S.R. et al.         | 2008 | North Carolina's Coasts in Crisis: a Vision for the Future                                                   |                                                                       |          | 1-<br>32.    |
| NC<br>13 | CIER                       | 2008 | Economic Impacts of Climate Change on North Carolina                                                         |                                                                       |          | 1-<br>20.    |
| NC<br>14 | McPherson, M.L.            | 2009 | Adaptation to Sea-Level Rise in North Carolina                                                               |                                                                       |          | 1-<br>118.   |
| NC<br>15 | PSDS                       | 2001 | Reducing Vulnerability in Five North Carolina Coastal Communities                                            |                                                                       |          | 1-<br>121.   |
| NJ<br>1  | Cooper, M.J.P. et<br>al.   | 2008 | The Potential Impacts of Sea Level Rise on the Coastal Region of New Jersey, USA                             | Climatic<br>Change                                                    | 90 (4)   | 475.         |
| NJ<br>2  | Kirshen, P. et al.         | 2008 | Coastal Flooding in the Northeastern United States Due to Climate Change                                     | Mitigation<br>and<br>Adaptation<br>Strategies<br>for Global<br>Change | 13 (5-6) | 437-<br>451. |

|          |                            |      |                                                                                                                      |                                                       |        |          |
|----------|----------------------------|------|----------------------------------------------------------------------------------------------------------------------|-------------------------------------------------------|--------|----------|
| NJ<br>3  | Neumann, J.E. et al.       | 2010 | Assessing Sea-Level Rise Impacts: A GIS-Based Framework and Application to Coastal New Jersey                        | Coastal management                                    | 38 (4) | 433–455. |
| NJ<br>4  | Williams, B.K. et al.      | 2014 | Adaptive Management: From More Talk to Real Action                                                                   | Environmental Management                              | 53 (2) | 465–479. |
| NJ<br>5  | Putra, H.C. et al.         | 2015 | Modeling Real Estate Market Responses to Climate Change in the Coastal Zone                                          | Journal of Artificial Societies and Social Simulation | 18 (2) | 18.      |
| NJ<br>6  | Titus                      | 1990 | Greenhouse Effect, Sea Level Rise, and Barrier Islands: Case Study of Long Beach Island, New Jersey                  | Coastal Management                                    | 18     | 65–90.   |
| NJ<br>7  | Colon, J. et al.           | 2007 | Climate Change Mitigation and Coastal Adaptation Strategies for New Jersey                                           | Global Environmental Change                           | 15 (3) | 199–213. |
| NJ<br>8  | Cooper, M.J.P. et al.      | 2005 | Future Sea Level Rise and the New Jersey Coast                                                                       |                                                       |        | 1–37.    |
| NJ<br>9  | GCC                        | 2014 | Insights into Media Coverage of Climate Change and Severe Weather Events in New Jersey                               |                                                       |        | 1–11.    |
| NJ<br>10 | Pflicke, K.M. et al.       | 2015 | Populations Vulnerable to Climate Change in New Jersey: Update of a Statistical Analysis                             |                                                       |        | 1–23.    |
| NJ<br>11 | Senick, J.                 | 2014 | The Role of Buildings in Climate Adaptation Climate Change Preparedness in New Jersey                                |                                                       |        | 1–22.    |
| NJ<br>12 | Bickers, K.M.              | 2014 | Vulnerable Populations to Climate Change in New Jersey                                                               |                                                       |        | 1–50.    |
| NJ<br>13 | Lathrop, R.G. and Love, A. | 2007 | Vulnerability of New Jersey’s Coastal Habitats to Sea Level Rise                                                     |                                                       |        | 1–17.    |
| NJ<br>14 | McGrath, K.M.              | 2014 | Climate Change Preparedness and Resiliency: Funding and Financing Strategies for New Jersey                          |                                                       |        | 1–47.    |
| NJ<br>15 | Strauss, B. et al.         | 2014 | New Jersey and the Surging Sea a Vulnerability Assessment With Projections For Sea Level Rise and Coastal Flood Risk |                                                       |        | 1–45.    |
| NJ<br>16 | Kana, T.W. et al.          | 1989 | New Jersey Case Study                                                                                                |                                                       |        | 1–25.    |
| NJ<br>17 | Kinsey, D.N.               | 2015 | Implications for Local Planning Practice of Policy Recommendations of the New Jersey Climate Adaptation Alliance     |                                                       |        | 1–19.    |
| NJ<br>18 | RPA                        | 2015 | Where to Reinforce-Retreat                                                                                           |                                                       |        | 1–16.    |

|          |                                 |      |                                                                                                                                                                              |                                                             |        |            |
|----------|---------------------------------|------|------------------------------------------------------------------------------------------------------------------------------------------------------------------------------|-------------------------------------------------------------|--------|------------|
| NJ<br>19 | NJCMP                           | 2011 | Coastal Community Vulnerability & Resilience Assessment Pilot                                                                                                                |                                                             |        | 1–37.      |
| NJ<br>20 | NJSC(Sea Grant)                 | 2010 | New Jersey Coastal Community Resilience Demonstration Project                                                                                                                |                                                             |        | 1–72.      |
| NJ<br>21 | NJCAP                           | 2012 | NJ Climate Adaptation Directory User Guide                                                                                                                                   |                                                             |        | 1–11.      |
| NJ<br>22 | NCSL                            | 2008 | Assessing the Costs of Climate Change                                                                                                                                        |                                                             |        | 1–4.       |
| NJ<br>23 | NJDEP                           | 2011 | Greenwich Township Vulnerability Assessment                                                                                                                                  |                                                             |        | 1–37.      |
| NJ<br>24 | CATF                            | 2011 | New Jersey Climate Change Trends and Projection Summaries                                                                                                                    |                                                             |        | 1–12.      |
| NJ<br>25 | RPA                             | 2015 | Where to Reinforce, Where to Retreat                                                                                                                                         |                                                             |        | 1–16.      |
| NJ<br>26 | Williamson, S. et al.           | 2008 | Economic Impact of Climate Change                                                                                                                                            |                                                             |        | 1–17.      |
| NJ<br>27 | NJCAA                           | 2014 | An Analysis of NJ Climate Adaptation Alliance Coastal Recommendations Relative to Recent Programs and Legislation for Climate Adaptation in Delaware, Maryland, and New York |                                                             |        | 1–9.       |
| NY<br>1  | Frankhauser, S. et al.          | 1996 | Climate Change Costs: Recent Advancements in the Economic Assessment                                                                                                         | Energy Policy                                               | 24 (7) | 665–673.   |
| NY<br>2  | Blake, R. et al.                | 2000 | Climate Change Impacts on New York City's Water Supply System                                                                                                                | Journal of the American Water Resources Association         | 36 (2) | 279–292.   |
| NY<br>3  | Rosenzweig, C. and Solecki, W.D | 2001 | Climate Change and a Global City: Learning from New York                                                                                                                     | Environment: Science and Policy for Sustainable Development | 43 (3) | 8–18.      |
| NY<br>4  | Rosenzweig, C. et al.           | 2007 | Managing Climate Change Risks in New York City's Water System: Assessment and Adaptation Planning                                                                            | Mitigation and Adaptation Strategies for Global Change      | 12 (8) | 1391–1409. |

|          |                                |      |                                                                                                                                           |                                                        |          |          |
|----------|--------------------------------|------|-------------------------------------------------------------------------------------------------------------------------------------------|--------------------------------------------------------|----------|----------|
| NY<br>5  | Laukkonen, J. et al.           | 2009 | Combining Climate Change Adaptation and Mitigation Measures at the Local Level                                                            | Habitat international                                  | 33 (3)   | 287–292. |
| NY<br>6  | Halsnæs, K. and Trærup, S.     | 2009 | Development and Climate Change: A Mainstreaming Approach for Assessing Economic, Social, and Environmental Impacts of Adaptation Measures | Environmental management                               | 43 (5)   | 765–778. |
| NY<br>7  | Hammer, S. et al.              | 2009 | The Impacts of Climate Change on New York City's Energy Sector: Vulnerabilities and Potential Adaptation Strategies                       | IOP Conference Series: Earth and Environmental Science | 6 (33)   | 1–2.     |
| NY<br>8  | Carson, S.T. and Montz B.E.    | 2009 | Planning for Climate Change: An analysis of Vulnerability in Suffolk County, New York                                                     | Environmental Hazards                                  | 8 (2)    | 133–148. |
| NY<br>9  |                                | 2010 | Executive Summary of Climate Change Adaptation in New York City: Building a Risk Management Response                                      | Annals of the New York Academy of Sciences             | 1196 (1) | 1–3.     |
| NY<br>10 | Bloomberg, M.R.                | 2010 | Forewords to Climate Change Adaptation in New York City: Building a Risk Management Response                                              | Annals of the New York Academy of Sciences             | 1196 (1) | 1–3.     |
| NY<br>11 | Major, D.C. and O'Grady, M.    | 2010 | Adaptation Assessment Guidebook                                                                                                           | Annals of the New York Academy of Sciences             | 1196 (1) | 229–292. |
| NY<br>12 | Quay, R.                       | 2010 | Anticipatory Governance                                                                                                                   | The handbook of science and technology studies         |          | 979.     |
| NY<br>13 | Rosenzweig, C. and Solecki, W. | 2010 | Chapter 1: New York City Aadaptation in Context                                                                                           | Annals of the New York Academy of Sciences             | 1196 (1) | 19–28.   |

|          |                                   |      |                                                                                                 |                                            |          |            |
|----------|-----------------------------------|------|-------------------------------------------------------------------------------------------------|--------------------------------------------|----------|------------|
| NY<br>14 | Rosenzweig, C.<br>and Solecki, W. | 2010 | Introduction to Climate Change Adaptation in New York City: Building a Risk Management Response | Annals of the New York Academy of Sciences | 1196 (1) | 13–18.     |
| NY<br>15 | Rosenzweig, C.<br>and Solecki, W. | 2010 | Preface to Climate Change Adaptation in New York City: Building a Risk Management Response      | Annals of the New York Academy of Sciences | 1196 (1) | 1–3.       |
| NY<br>16 | Sussman, E. et al.                | 2010 | Chapter 5: Law and Regulation                                                                   | Annals of the New York Academy of Sciences | 1196 (1) | 87–112.    |
| NY<br>17 | Zimmerman, R.<br>and Faris, C.    | 2010 | Chapter 4: Infrastructure Impacts and Adaptation Challenges                                     | Annals of the New York Academy of Sciences | 1196 (1) | 63–86.     |
| NY<br>18 | Quay R.                           | 2010 | Anticipatory Governance: A Tool for Climate Change Adaptation                                   | Journal of American Planning Association   | 76 (4)   | 496–511.   |
| NY<br>20 | Yohe G. and<br>Leichenko, R.      | 2010 | Adopting a Risk-Based Approach                                                                  | Annals of the New York Academy of Sciences | 1196 (1) | 29–40.     |
| NY<br>21 | Delgado, J.A. et al.              | 2011 | Conservation Practices to Mitigate and Adapt to Climate Change                                  | Journal of Soil and Water Conservation     | 66 (4)   | 118A–129A. |
| NY<br>22 | Lal, R. et al.                    | 2011 | Management to Mitigate and Adapt to Climate Change                                              | Journal of Soil and Water Conservation     | 66 (4)   | 276–285.   |
| NY<br>23 | Meyer, M.D. and<br>Weigel, B.     | 2011 | Climate Change and Transportation Engineering: Preparing for a Sustainable Future               | Journal of Transportation Engineering      | 137 (6)  | 393–403.   |

|          |                                    |      |                                                                                                                                                                |                                   |         |          |
|----------|------------------------------------|------|----------------------------------------------------------------------------------------------------------------------------------------------------------------|-----------------------------------|---------|----------|
| NY<br>24 | Nicholls, R.J.                     | 2011 | Planning for the Impacts of Sea Level Rise                                                                                                                     | Oceanography                      | 24 (2)  | 144–157. |
| NY<br>25 | Rowland, E.L.                      | 2011 | Approaches to Evaluating Climate Change Impacts on Species: A Guide to Initiating the Adaptation Planning Process                                              | Environmental Management          | 47 (3)  | 322–337. |
| NY<br>26 | Kopytko, N. and Perkins, J.        | 2011 | Climate Change, Nuclear Power, and the Adaptation Mitigation Dilemma                                                                                           | Energy Policy                     | 39 (1)  | 318–333. |
| NY<br>27 | Wolfe, D.W.                        | 2011 | Responding to Climate Change in New York State: the ClimAID Integrated Assessment for Effective Climate Change Adaptation in New York State. Technical Report. |                                   |         | 1–652.   |
| NY<br>28 | Leichenko, R. et al.               | 2011 | An Economic Analysis of Climate Change Impacts and Adaptations in New York State                                                                               |                                   |         | 1–149.   |
| NY<br>29 | Solecki, W.                        | 2012 | Urban Environmental Challenges and Climate Change Action in New York City                                                                                      | Environment and Urbanization      | 24 (2)  | 557–573. |
| NY<br>30 | Saavedra, C. et al.                | 2012 | Assessing Resilience to Climate Change in US Cities                                                                                                            | Urban Studies Research            |         | 1–3.     |
| NY<br>31 | Schmeltz, M. et al.                | 2013 | Lessons from Hurricane Sandy: a Community Response in Brooklyn, New York                                                                                       | Journal of Urban Health           | 90 (5)  | 799–809. |
| NY<br>32 | Watson, J. et al.                  | 2013 | Mapping Vulnerability and Conservation Adaptation Strategies Under Climate Change                                                                              | Nature Climate Change             | 3 (11)  | 989.     |
| NY<br>33 | Hamilton, M.C. et al.              | 2013 | Case Studies of Scenario Analysis for Adaptive Management of Natural Resource and Infrastructure Systems                                                       | Environment Systems & Decisions   | 33 (1)  | 89–103.  |
| NY<br>34 | Knowlton, K. and Rotkin-Ellman, M. | 2013 | Post-Sandy Preparedness Policies Lag as Sea Levels Rise                                                                                                        | Environmental Health Perspectives | 121 (7) | 1.       |
| NY<br>35 | Jabareen, Y.                       | 2013 | Planning for Countering Climate Change: Lessons from the Recent Plan of New York City - PlaNYC 2030                                                            | International Planning Studies    | 18 (2)  | 221–242. |
| NY<br>36 | Ausden, M.                         | 2014 | Climate Change Adaptation: Putting Principles into Practice                                                                                                    | Environmental Management          | 54 (4)  | 685–698. |
| NY<br>37 | Ausden, M.                         | 2014 | Erratum to: Climate Change Adaptation: Putting Principles into Practice                                                                                        | Environmental                     | 54 (4)  | 699.     |



|          |                                          |      |                                                                                                                           |                                                                       |          |                        |
|----------|------------------------------------------|------|---------------------------------------------------------------------------------------------------------------------------|-----------------------------------------------------------------------|----------|------------------------|
|          |                                          |      |                                                                                                                           | managem<br>t                                                          |          |                        |
| NY<br>38 | Perdinan and<br>Winkler, J.A.            | 2014 | Changing Human Landscapes Under a Changing<br>Climate: Considerations for Climate Assessments                             | Environme<br>ntal<br>managem<br>ent                                   | 53 (1)   | 42–<br>54.             |
| NY<br>39 | Loo, C.                                  | 2014 | The Role of Community Participation in Climate<br>Change Assessment and Research                                          | Journal of<br>agricultural<br>and<br>environmen<br>tal ethics         | 27 (1)   | 65–<br>85.             |
| NY<br>40 | Rosenzweig, C.<br>and Solecki, W.        | 2014 | Hurricane Sandy and Adaptation Pathways in New<br>York: Lessons From a First-Responder City                               | Global<br>Environme<br>ntal Change                                    | 28       | 395–<br>408.           |
| NY<br>41 | Mason E. and<br>Montalto, F.A.           | 2014 | The Overlooked Role of New York City Urban Yards<br>in Mitigating and Adapting to Climate Change                          | Local<br>Environme<br>nt                                              | 20 (12)  | 1412<br>–<br>1427<br>. |
| NY<br>42 | Rosenzweig, C.<br>and Solecki, W.        | 2015 | New York City Panel on Climate Change 2015<br>Report Introduction                                                         | Annals of<br>the New<br>York<br>Academy of<br>Sciences                | 1336 (1) | 3–5.                   |
| NY<br>43 | Quay, R.                                 | 2010 | Anticipatory Governance: A Tool for Climate<br>Change Adaptation                                                          | Journal of<br>the<br>American<br>Planning<br>Association              | 76 (4)   | 496–<br>511.           |
| NY<br>44 | Aerts, J.C.J.H.<br>and Botzen,<br>W.J.W. | 2011 | Flood-Resilient Waterfront Development in New<br>York City: Bridging Flood Insurance, Building<br>Codes, and Flood Zoning | Annals of<br>the New<br>York<br>Academy of<br>Sciences                | 1227 (1) | 1–<br>82.              |
| NY<br>45 | Shepard, C. et al.                       | 2011 | Assessing Sea Level Rise on Storm Surge Risk for the<br>Southern Shores of Long Island, New York                          | Natural<br>Hazards                                                    | 60 (2)   | 727–<br>745.           |
| NY<br>46 | Rosenzweig, C.<br>et al.                 | 2007 | Managing Climate Change Risks in New York City’s<br>Water System: Assessment and Adaptation<br>Planning                   | Mitigation<br>and<br>Adaptation<br>Strategies<br>for Global<br>Change | 12 (8)   | 1391<br>–<br>1409<br>. |

|          |                          |      |                                                                                                                                                                |                                                                 |               |                        |
|----------|--------------------------|------|----------------------------------------------------------------------------------------------------------------------------------------------------------------|-----------------------------------------------------------------|---------------|------------------------|
| NY<br>47 | Rosenzweig, C.<br>et al. | 2010 | Developing Coastal Adaptation to Climate Change in the New York City Infrastructure-Shed: Process, Approach, Tools, and Strategies                             | Climatic<br>Change                                              | 106 (1)       | 93–<br>127.            |
| NY<br>48 | NYAS                     | 2009 | Climate Change Adaptation in New York City Building a Risk Management Response                                                                                 | Annals of<br>the New<br>York<br>Academy of<br>Sciences          | 1196 (1)      | 1–3.                   |
| NY<br>49 | Horton, R.M. et<br>al.   | 2011 | Climate Hazard Assessment for Stakeholder Adaptation Planning in New York City                                                                                 | Journal of<br>Applied<br>Meteorolog<br>y and<br>Climatolog<br>y | 50 (11)       | 2247<br>–<br>2266<br>. |
| NY<br>50 | Matonse, A.H. et<br>al.  | 2012 | Investigating the Impact of Climate Change on New York City’s Primary Water Supply                                                                             | Climatic<br>Change                                              | 116 (3-<br>4) | 437–<br>456.           |
| NY<br>51 | NYC BRTF                 | 2013 | Building a Resiliency Task Force                                                                                                                               |                                                                 |               | 1–<br>35.              |
| NY<br>52 | NYC DEP                  | 2008 | Assessment and Action Plan                                                                                                                                     |                                                                 |               | 1–<br>102.             |
| NY<br>53 | NYC EDC                  | 2013 | Goal 8: Identify and pursue strategies to increase the city’s resilience to climate change and sea level rise.                                                 |                                                                 |               | 104–<br>113.           |
| NY<br>54 | NYC PCC                  | 2013 | Climate Risk Information 2013 Observations, Climate Change Projections, and Maps                                                                               |                                                                 |               | 1–<br>38.              |
| NY<br>55 | DEC                      | 2007 | Climate Change Preparedness in New Jersey                                                                                                                      |                                                                 |               | 1–4.                   |
| NY<br>56 | NYS 2100                 | 2012 | Recommendations to Improve the Strength and Resilience of the Empire State’s Infrastructure                                                                    |                                                                 |               | 1–<br>206.             |
| NY<br>57 | NYSSLRT                  | 2010 | SLR Task Force Report to Legislature                                                                                                                           |                                                                 |               | 1–<br>103.             |
| NY<br>58 | Jacob, K. et al.         | 2008 | MTA Adaptations to Climate Change A Categorical Imperative.                                                                                                    |                                                                 |               | 1–<br>48.              |
| NY<br>59 | Rosenzweig, C.<br>et al. | 2011 | Responding to Climate Change in New York State: the ClimAID Integrated Assessment for Effective Climate Change Adaptation in New York State. Synthesis Report. |                                                                 |               | 1–<br>57.              |
| NY<br>60 | Aldrich, S. et al.       | 2009 | Helping Hudson River Communities Adapt to Climate Change Scenario Planning 2010 – 2030 Executive Summary                                                       |                                                                 |               | 1–<br>16.              |
| NY<br>61 | Shweitzer, J.            | 2014 | Climate Change Legal Remedies: Hurricane Sandy and New York City Coastal Adaptation                                                                            |                                                                 |               | 1–<br>54.              |

|          |                                   |      |                                                                                                                                |                                                        |         |              |
|----------|-----------------------------------|------|--------------------------------------------------------------------------------------------------------------------------------|--------------------------------------------------------|---------|--------------|
| NY<br>62 | NYC                               | 2013 | Urban Waterfront Adaptation Strategies                                                                                         |                                                        |         | 1–<br>68.    |
| CT<br>1  | Farrell, P.E.                     | 2008 | Climate Change Action in Connecticut: Linking Energy, the Environment and the Economy                                          | UCLA J. Env'tl. L. & Pol'y                             | 27      | 281.         |
| CT<br>2  | Keenan, N.J. and Oldfield, S.G.   | 2012 | The Urban Impacts Toolbox: An Initial Assessment of Climate Change Flood Adaptation Options for Westport                       | Weather and Climate                                    | 32 (2)  | 40–<br>61.   |
| CT<br>3  | Tsvetanov, T.G. and Shah, F.A.    | 2013 | The Economic Value of Delaying Adaptation to Sea-Level Rise: An Application to coastal properties in Connecticut               | Climatic change                                        | 121 (2) | 177–<br>193. |
| CT<br>4  | Genova, L.K. et al.               | 2010 | The Likelihood of Shore Protection,                                                                                            |                                                        |         | 1–<br>74.    |
| CT<br>5  | CTDEEP                            | 2014 | Taking Action on Climate Change 2014 Progress Report                                                                           |                                                        |         | 1–<br>44.    |
| CT<br>6  | GSC                               | 2011 | Connecticut Climate Change Preparedness Plan                                                                                   |                                                        |         | 1–<br>111.   |
| CT<br>7  | CTDEP                             | 2009 | Facing our Future: Adaptation to Connecticut's Changing Climate                                                                |                                                        |         | 1–<br>51.    |
| CT<br>8  | town of Groton                    | 2011 | Climate Change and Sustainable Community                                                                                       |                                                        |         | 1–<br>91.    |
| CT<br>9  | Gornitz, V. et al.                | 2004 | Bracing for Climate Change in the Constitution State                                                                           |                                                        |         | 1–<br>54.    |
| CT<br>10 | Ambrette, B. and Welch, A.W.      | 2013 | Adapting to the Rise, Guide for Connecticut's Coastal Communities                                                              |                                                        |         | 1–<br>25.    |
| RI<br>1  | Becker, A. and Caldwell, M.R.     | 2015 | Stakeholder Perceptions of Seaport Resilience Strategies: A Case Study of Gulfport (Mississippi) and Providence (Rhode Island) | Coastal Management                                     | 43 (1)  | 1–<br>34.    |
| RI<br>2  | Rhode Island Climate Change Comm. | 2012 | Adapting to Climate Change in the Ocean State: A Starting Point                                                                |                                                        |         | 1–<br>38.    |
| RI<br>3  | Weidman, J. et al.                | 2013 | Block Island Harbors Sea Level Rise Adaptation Study                                                                           |                                                        |         | 1–<br>43.    |
| RI<br>4  | Heffner, L. et al.                | 2012 | Climate Change and Rhode Island's Coast                                                                                        |                                                        |         | 1–<br>37.    |
| MA<br>1  | Clark, G.E. et al.                | 1998 | Assessing the Vulnerability of Coastal Communities to Extreme Storms: The Case of Revere, MA., USA                             | Mitigation and adaptation strategies for global change | 3 (1)   | 59–<br>82.   |
| MA<br>2  | Morgan, M.G. et al.               | 2005 | Learning from the U.S. National Assessment of Climate Change Impacts                                                           | Environmental Science                                  |         | 9023<br>–    |

|          |                           |      |                                                                                                                                                                      |                                                                       |          |              |
|----------|---------------------------|------|----------------------------------------------------------------------------------------------------------------------------------------------------------------------|-----------------------------------------------------------------------|----------|--------------|
|          |                           |      |                                                                                                                                                                      | and<br>Technology                                                     |          | 9032<br>.    |
| MA<br>3  | Suarez, P. et al.         | 2005 | Impacts of Transportation: A Systemwide Performance Assessment of the Boston Metro Area                                                                              | Transportat<br>ion<br>Research                                        | 10 (3)   | 231–<br>244. |
| MA<br>4  | Kirshen, P. et al.        | 2008 | Climate Change and Coastal Flooding in Metro Boston: Impacts and Adaptation Strategies                                                                               | Climatic<br>Change                                                    | 90 (4)   | 453–<br>473. |
| MA<br>5  | Kirshen, P. et al.        | 2008 | Interdependencies of Urban Climate Change Impacts and Adaptation Strategies: a Case Study of Metropolitan Boston USA                                                 | Climatic<br>change                                                    | 86 (1-2) | 105–<br>122. |
| MA<br>6  | Pyke, C. et al.           | 2011 | Assessment of Low Impact Development for Managing Stormwater With Changing Precipitation Due to Climate Change                                                       | Journal of<br>the<br>American<br>Planning<br>Association              | 80 (2)   | 110–<br>122. |
| MA<br>7  | Guercio, L.D.             | 2013 | Climate Change Adaptation and Coastal Property Rights: a Massachusetts Case Study                                                                                    | BC Env'tl.<br>Aff. L. Rev.                                            | 40       | 349.         |
| MA<br>8  | Hamin, E.M. et al.        | 2014 | Barriers to Municipal Climate Adaptation: Examples From Coastal Massachusetts Smaller Cities and Towns                                                               | Journal of<br>the<br>American<br>Planning<br>Association              | 80 (2)   | 110–<br>122. |
| MA<br>9  | Douglas, E. et al.        | 2012 | Coastal Flooding, Climate Change and Environmental Justice: Identifying Obstacles and Incentives for Adaptation in Two Metropolitan Boston Massachusetts Communities | Mitigation<br>and<br>Adaptation<br>Strategies<br>for Global<br>Change | 17 (5)   | 537–<br>562. |
| MA<br>10 | Rasmussen, B. et al.      | 2012 | A Framework for Considering Climate Change in Transportation and Land Use Scenario Planning Lessons Learned from an Interagency Pilot Project on Cape Cod            |                                                                       |          | 1–<br>119.   |
| MA<br>11 | Cape Cod Commission       | 2012 | Cape Cod Regional Wastewater Management Plan Sea-level Rise and Its Implications                                                                                     |                                                                       |          | 1–<br>12.    |
| MA<br>12 | MA AAC                    | 2011 | Massachusetts Climate Change Adaptation Report                                                                                                                       |                                                                       |          | 1–<br>128.   |
| MA<br>13 | MA GWSA                   | 2013 | Clean Energy & Climate Plan for 2020: Summary Reports                                                                                                                |                                                                       |          | 1–<br>10.    |
| MA<br>14 | Menino, T.M.              | 2007 | An Order Relative to Climate Action in Boston                                                                                                                        |                                                                       |          | 1–3.         |
| MA<br>15 | Lubber, M. and Hunt, J.W. | 2010 | Sparking Boston's Climate Revolution                                                                                                                                 |                                                                       |          | 1–<br>54.    |

|          |                                   |      |                                                                                                                                   |                                                        |         |              |
|----------|-----------------------------------|------|-----------------------------------------------------------------------------------------------------------------------------------|--------------------------------------------------------|---------|--------------|
| MA<br>16 | Worcester Gov                     | 2006 | Climate Action Plan                                                                                                               |                                                        |         | 1–<br>236.   |
| MA<br>17 | Douglas, E. et al.                | 2013 | Preparing for the Rising Tide                                                                                                     |                                                        |         | 1–<br>81.    |
| MA<br>18 | Susskind, L. et al.               | 2014 | Stakeholder Assessment Barnstable, Massachusetts                                                                                  |                                                        |         | 1–<br>24.    |
| MA<br>19 | Kleinfelder, Inc.                 | 2015 | Vulnerability Assessment and Adaptation Plan                                                                                      |                                                        |         | 1.           |
| MA<br>20 | Walberg, E.                       | 2013 | Tidmarsh Farms, MA, Climate Change Adaptation Plan                                                                                |                                                        |         | 1–<br>24.    |
| ME<br>1  | Johnston, A. et al.               | 2014 | Assessing the Vulnerability of Coastal Infrastructure to Sea Level Rise Using Multi-Criteria Analysis in Scarborough, Maine (USA) | Ocean & Coastal Management                             | 95      | 176–<br>188. |
| ME<br>2  | Moser, S.C.                       | 2005 | Impact assessments and policy responses to sea-level rise in three US states: An exploration of human-dimension uncertainties     | Global Environmental Change                            | 15 (4)  | 353–<br>369. |
| ME<br>3  | MLI et al.                        | 1995 | Anticipatory Planning For Sea-Level Rise Along The Coast of Maine                                                                 |                                                        |         | 1–<br>48.    |
| ME<br>4  | Slovinsky, P.A. and Dickson, S.M. | 2006 | Impacts of Future Sea Level Rise on the Coastal Floodplain                                                                        |                                                        |         | 1–<br>26.    |
| ME<br>5  | 124th ME Legislature              | 2010 | Legislative Charge and Basis for Action                                                                                           |                                                        |         | 1–<br>68.    |
| ME<br>6  | MEDEP                             | 2011 | Adapting to a Changing Climate Charting Maine's Course                                                                            |                                                        |         | 1–<br>12.    |
| ME<br>7  | MEDOT                             | 2009 | Climate Change and Transportation in Maine                                                                                        |                                                        |         | 1–<br>10.    |
| ME<br>8  | Jacobson, G.L. et al.             | 2009 | Maine's Climate Future                                                                                                            |                                                        |         | 1–<br>74.    |
| ME<br>9  | Susskind, L. et al.               | 2014 | Stakeholder Assessment, Wells, Maine                                                                                              |                                                        |         | 1–<br>32.    |
| NH<br>1  | Wake, C.P. et al.                 | 2011 | Vulnerability Assessment and Adaptation Plan                                                                                      | The Northeastern Geographer                            | 3       | 1–<br>21.    |
| NH<br>2  | Frumhoff, P.C. et al.             | 2008 | An Integrated Climate Change Assessment for the Northeast United States                                                           | Mitigation and Adaptation Strategies for Global Change | 13(5-6) | 419–<br>423. |

|          |                                        |      |                                                                          |                                                             |         |          |
|----------|----------------------------------------|------|--------------------------------------------------------------------------|-------------------------------------------------------------|---------|----------|
| NH<br>3  | Hayho, K. et al.                       | 2008 | Regional Climate Change Projections for the Northeast USA                | Mitigation and Adaptation Strategies for Global Change      | 13(5-6) | 425-436. |
| NH<br>4  | Kirshen, P. et al.                     | 2008 | Coastal Flooding in the Northeastern United States Due to Climate Change | Mitigation and Adaptation Strategies for Global Change      | 13(5-6) | 437-451. |
| NH<br>5  | Cleaves, S.M. et al.                   | 2009 | Climate Action Planning at the University of New Hampshire               | International Journal of Sustainability in Higher Education | 10(3)   | 250-265. |
| NH<br>6  | Wake, C.P. et al.                      | 2013 | Climate Change and Lamprey River Flooding                                |                                                             |         | 1-31.    |
| NH<br>7  | Wake, C.P. et al.                      | 2011 | Climate Change in Piscataqua Great Bay Region                            |                                                             |         | 1-54.    |
| NH<br>8  | Rockingham Planning Commission         | 2015 | Climate Change Chapter, Regional Plan, Seaport, NH                       |                                                             |         | 1-24.    |
| NH<br>9  | Rockingham Planning Commission         | 2009 | Adaptation to Increased Flood Risk                                       |                                                             |         | 1-24.    |
| NH<br>10 | Rockingham Planning Commission         | 2015 | Regional Master Plan, Climate Change Chapter                             |                                                             |         | 1-42.    |
| NH<br>11 | NH Coastal Risks and Hazard Commission | 2014 | Surge and Extreme Precipitation                                          |                                                             |         | 1-43.    |
| NH<br>12 | NH Coastal Risks and Hazard Commission | 2009 | NH Climate Action Plan                                                   |                                                             |         | 1-82.    |
| NH<br>13 | NH Fish and Game Dept.                 | 2013 | Ecosystems and Wildlife Climate Adaptation Plan                          |                                                             |         | 1-133.   |

**Table S3.** Observed and expected frequencies by subregion and type of database (Academic only or All-source),  $\chi^2(3) = 11.25$ ,  $p = .010$ . Items in brackets represent expected cell frequencies.

| Subregion           | Type of Database |            |
|---------------------|------------------|------------|
|                     | Academic         | All-source |
| Carolinas           | 11 [12.21]       | 15 [13.79] |
| Florida             | 54 [59.17]       | 72 [66.83] |
| New England         | 20 [26.30]       | 36 [29.70] |
| New York/New Jersey | 54 [41.32]       | 34 [46.68] |

**Table S4.** Observed and expected frequencies by region and document source,  $\chi^2(12) = 28.59$ ,  $p = .005$ . Items in brackets represent expected cell frequencies.

| Subregion   | Document Sources |            |            |            |            |
|-------------|------------------|------------|------------|------------|------------|
|             | Journal          | University | NGO        | Govt.      | Mixed      |
| Carolinas   | 11 [12.21]       | 3 [2.55]   | 1 [2.11]   | 4 [5.36]   | 7 [3.78]   |
| Florida     | 54 [59.17]       | 17 [12.34] | 14 [10.22] | 26 [25.97] | 15 [18.30] |
| New England | 21 [26.30]       | 2 [5.49]   | 4 [4.54]   | 21 [11.54] | 9 [8.14]   |
| NY-NJ       | 54 [41.32]       | 7 [8.62]   | 7 [7.14]   | 10 [18.14] | 12 [12.78] |
